# Supplementary material for: Impact of Zika Virus Emergence in French Guiana: A Large General Population Seroprevalence Survey
Source: PubMed Central journal article supplement — J Infect Dis. 2019 Aug 16;220(12):1915–25. doi: 10.1093/infdis/jiz396 (PMC6834069; doi:10.1093/infdis/jiz396), 2019-08-16
Supplement: jiz396_suppl_supplementary_data.pdf [file jiz396_suppl_supplementary_data.pdf]

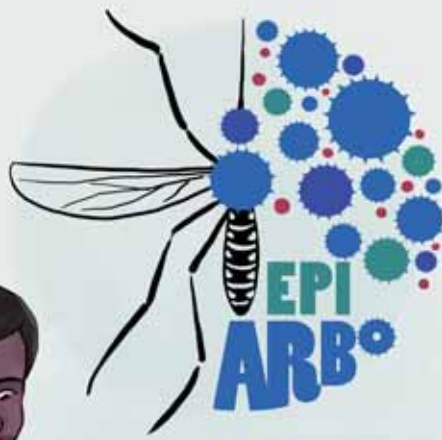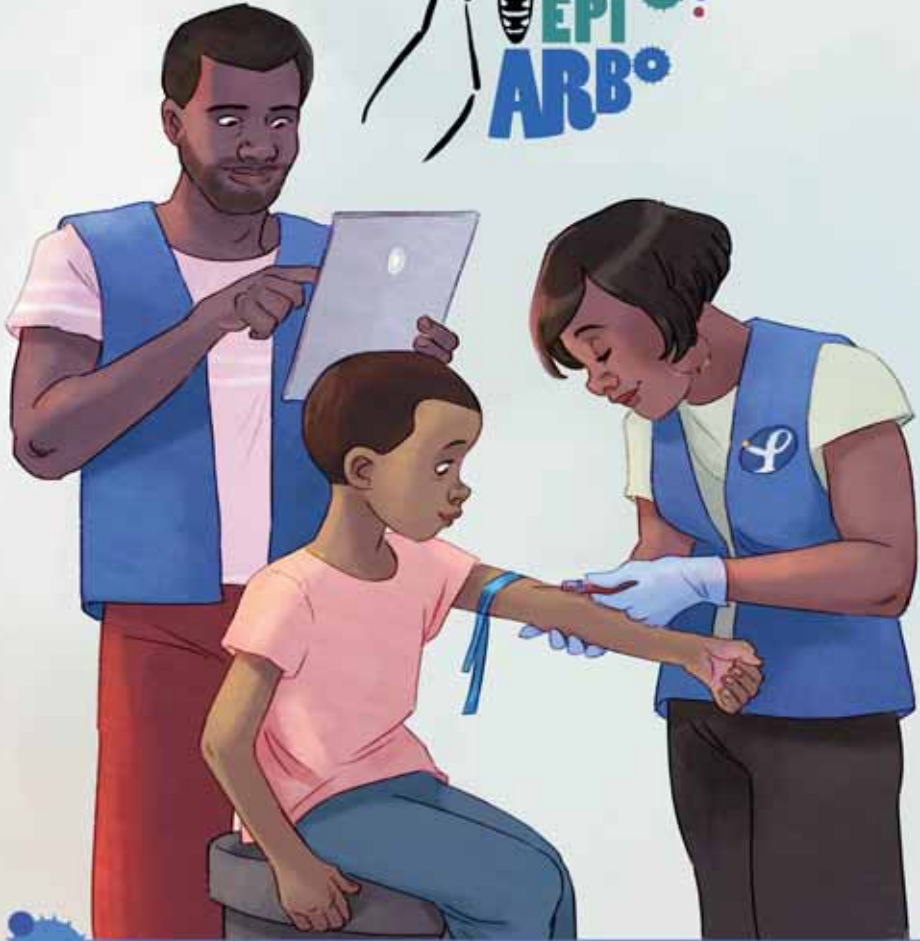

# Livret d'information – Enquête EPIARBO

Epidémiologie des arboviroses en Guyane

**E**n Guyane les moustiques propagent un certain nombre de Virus appelés « Arbovirus ». Ces derniers causent des maladies comme le Chikungunya, la dengue ou le Zika.

Il est difficile de savoir combien de personnes ont été infectées par ces virus. En effet, parfois la personne ne sera pas malade, ou alors les symptômes ne permettront pas de savoir quelle arbovirose la personne a contracté.

Pourtant, pour mettre en place des mesures de santé publique et protéger les personnes les plus vulnérables, il est important de savoir quels sont les virus qui ont circulé et quel pourcentage de la population a été affectée.

C'est pourquoi l'Institut Pasteur de la Guyane a proposé de lancer l'étude EpiArbo, financée par l'Union européenne, l'Institut Pasteur et le CNES.

2500 personnes tirées au sort dans la population Guyanaise recevront la visite d'enquêteurs de l'Institut Pasteur. S'ils acceptent de participer à cette recherche clinique, ces Guyanais fourniront un petit échantillon de sang qui permettra de savoir quel arbovirus ils ont déjà rencontré.

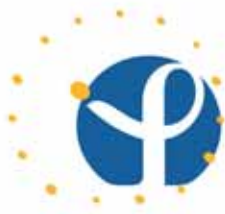

**Coordination scientifique du projet :**

Dr Claude Flamand,  
Unité d'épidémiologie, Institut Pasteur de la Guyane  
23 Avenue Pasteur  
BP 6010, 97306 Cayenne Cedex France  
Tél. : +594(0)594 29 26 15  
Fax : +594(0)594 29 58 18  
Courriel : [cflamand@pasteur-cayenne.fr](mailto:cflamand@pasteur-cayenne.fr)

En Guyane les moustiques peuvent te transmettre des virus comme la dengue, le chikungunya... ou le zika.

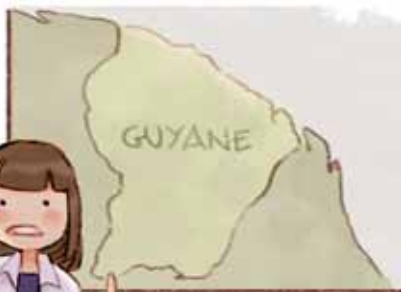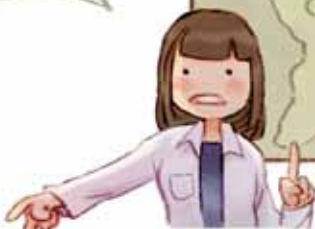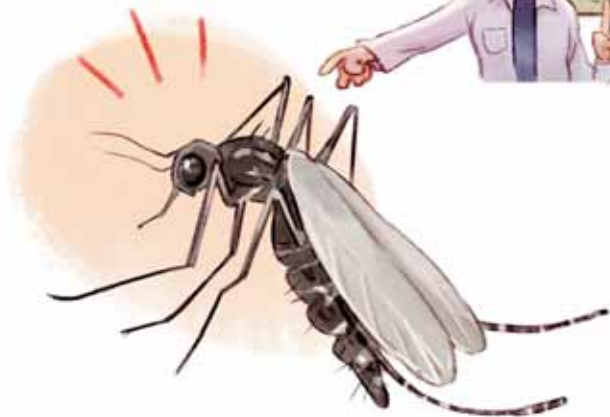

Parfois, quand on attrape ce virus on est malade...

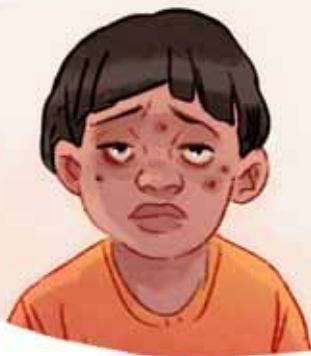

...et d'autres fois, on ne s'en rend même pas compte !

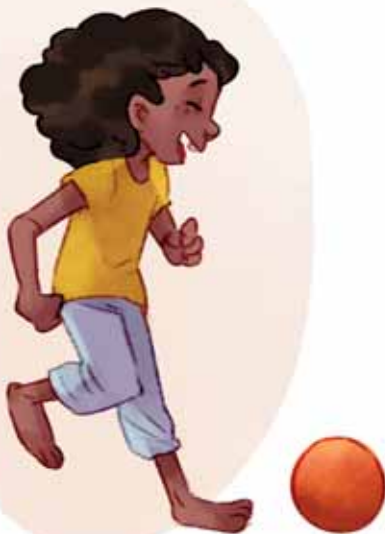

Dans notre corps,  
le « **système immunitaire** »  
est un peu comme une  
armée...

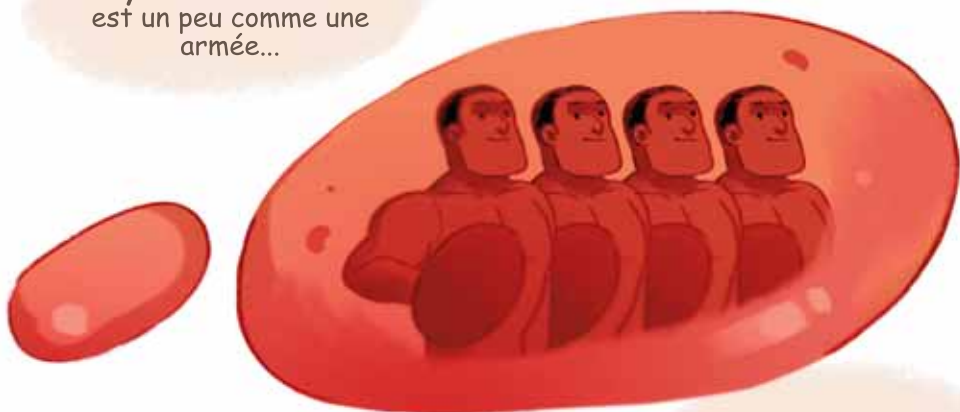

... composée de soldats  
qui nous défendent,  
qu'on appelle des  
« **anti-corps** ».

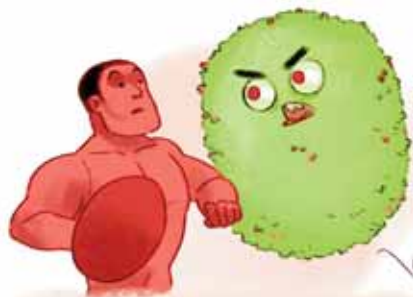

Chaque fois qu'un soldat du système  
immunitaire rencontre un nouveau  
virus ennemi...

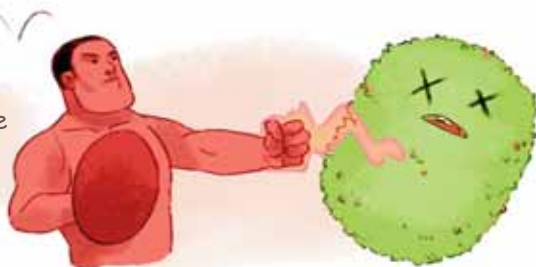

... il l'attaque et  
l'élimine, ce qui lui  
permet de se  
**spécialiser**.

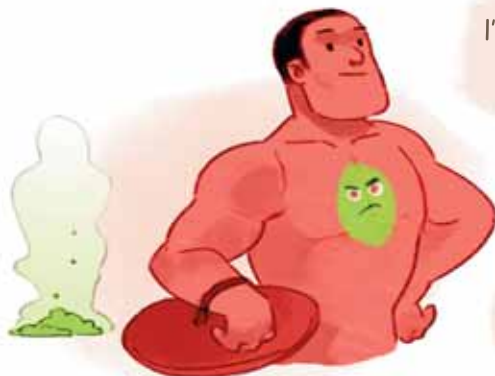

Si le virus du Zika, par  
exemple, est déjà venu  
dans ton corps, alors on  
peut trouver chez toi des  
soldats spécial Zika !

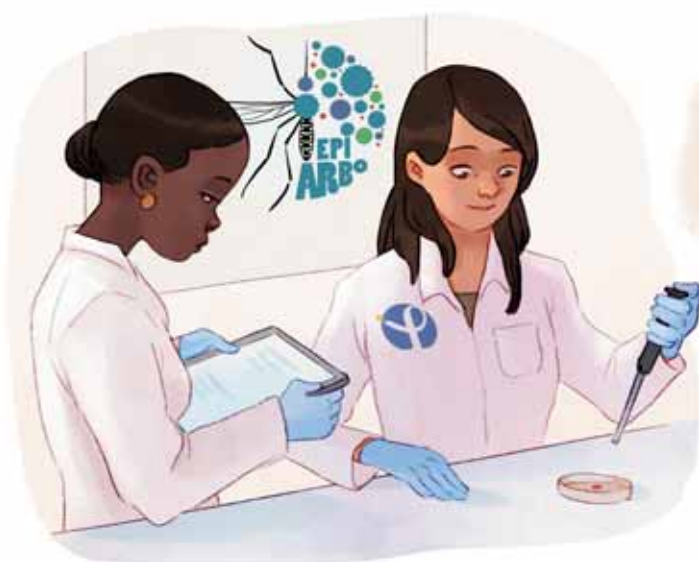

Les chercheurs de l'Institut Pasteur de Guyane aimeraient savoir combien de personnes, adultes et enfants, ont attrapé ces virus, en Guyane.

Ils vont donc regarder dans le sang des Guyanais quels type de soldats spécialisés sont présents !

Pour savoir quels virus les personnes ont déjà eu !

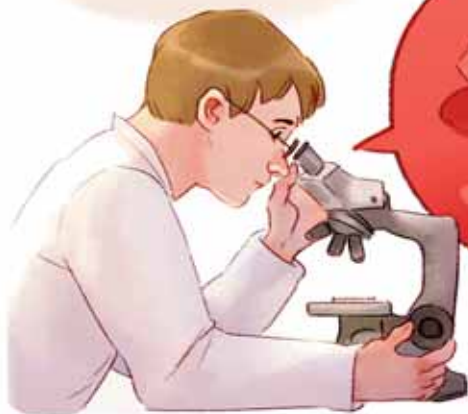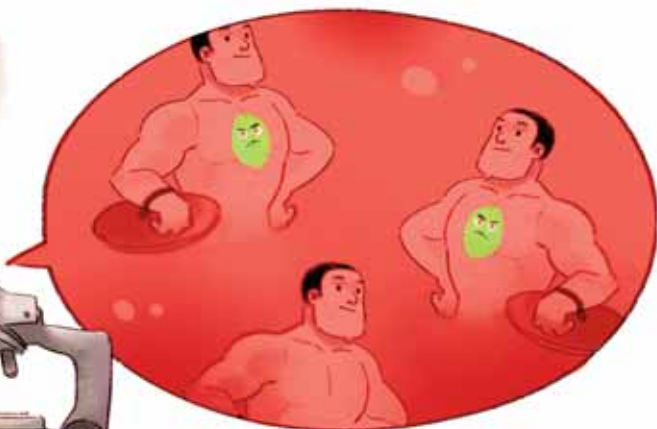

Nous demandons à **2500 personnes** de participer à cette étude, qui sera utile pour mieux prévoir les prochaines épidémies en Guyane.

Nous te proposons d'en faire partie, **toi aussi !**

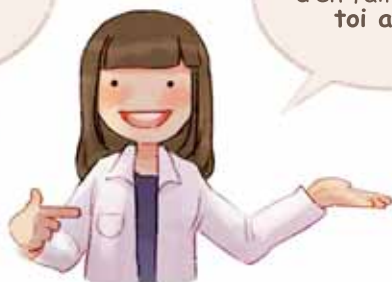



Pour cela on va te faire une petite prise de sang.

Il n'y a pas de risques car on prend une toute petite quantité.

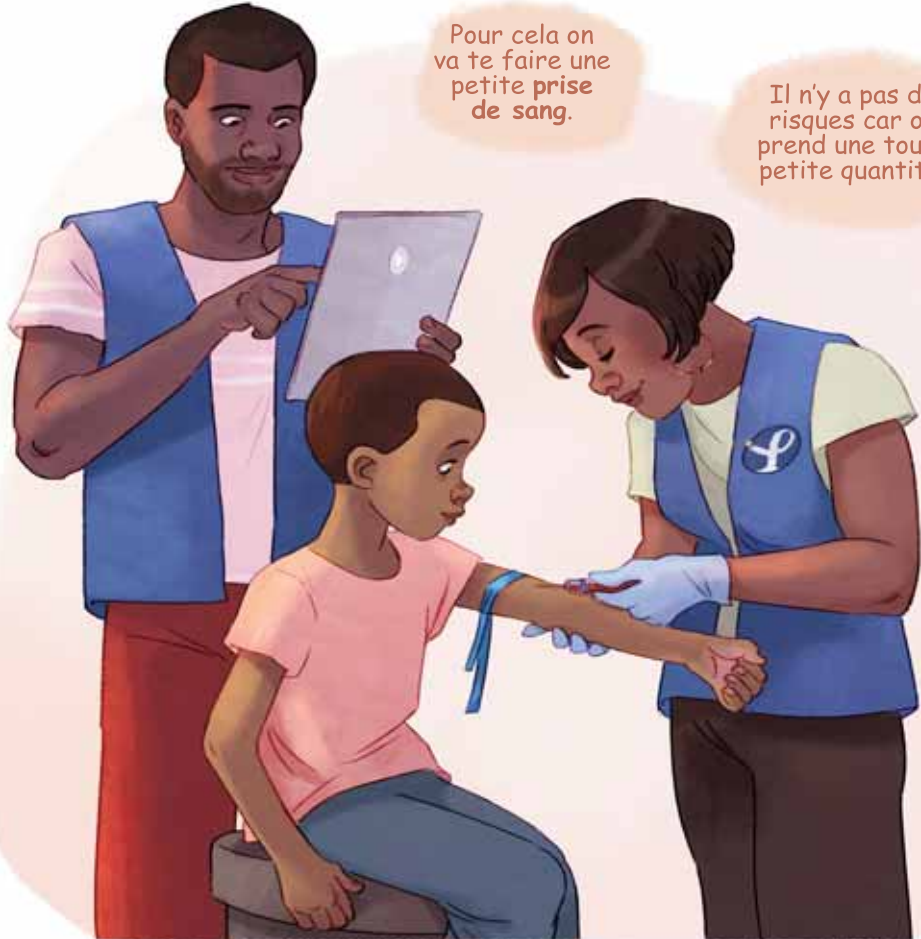

La pique peut faire une légère douleur, alors si tu le souhaites, on peut te proposer un **patch anesthésiant** pour que tu ne la ressentis pas.

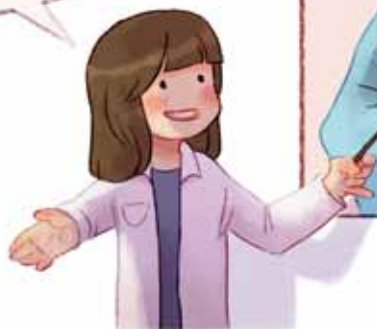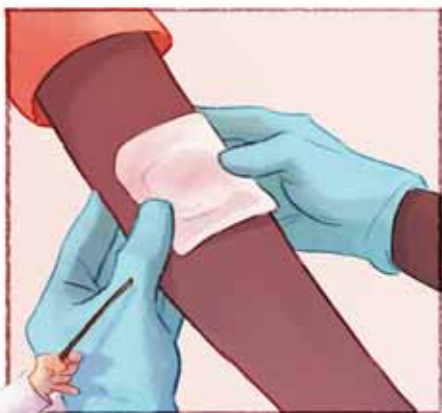

La loi protège les enfants, c'est pourquoi pour faire partie d'un programme de recherche tes parents doivent donner leur **accord** pour la collecte et l'analyse des échantillons de ton sang.

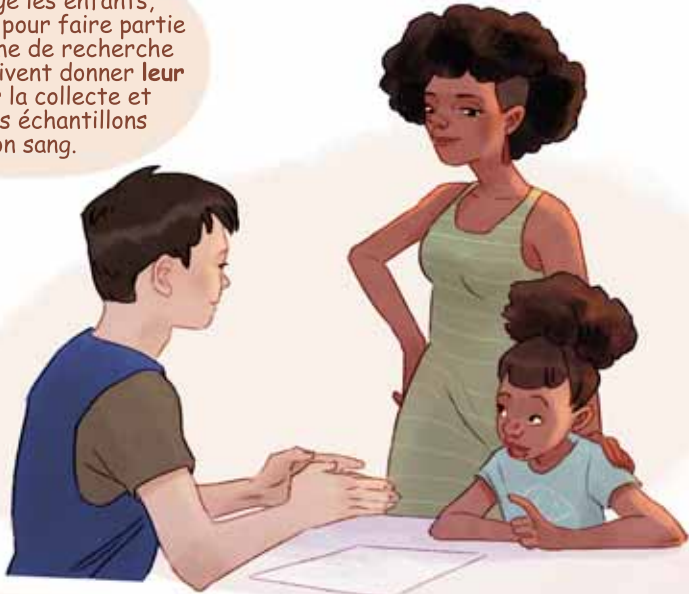

Tu peux **poser des questions** aux enquêteurs et à tes parents pour **comprendre** ce document, avant de leur dire si tu veux participer à cette étude.

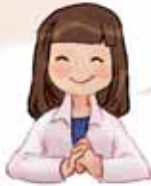

Il n'y a aucune obligation. Personne ne sera **déçu(e)** si tu ne souhaites pas participer. Mais si tu acceptes, on pourra mieux soigner les gens demain, et ce sera un peu grâce à toi !

Les informations te concernant (âge, sexe, données cliniques et résultats biologiques) seront enregistrées, mais ton nom sera remplacé par un code pour rester secret.

Si tu le souhaites, l'Institut Pasteur pourra t'envoyer un courrier qui t'informerait sur les types de soldats que l'on aura trouvés dans ton sang.

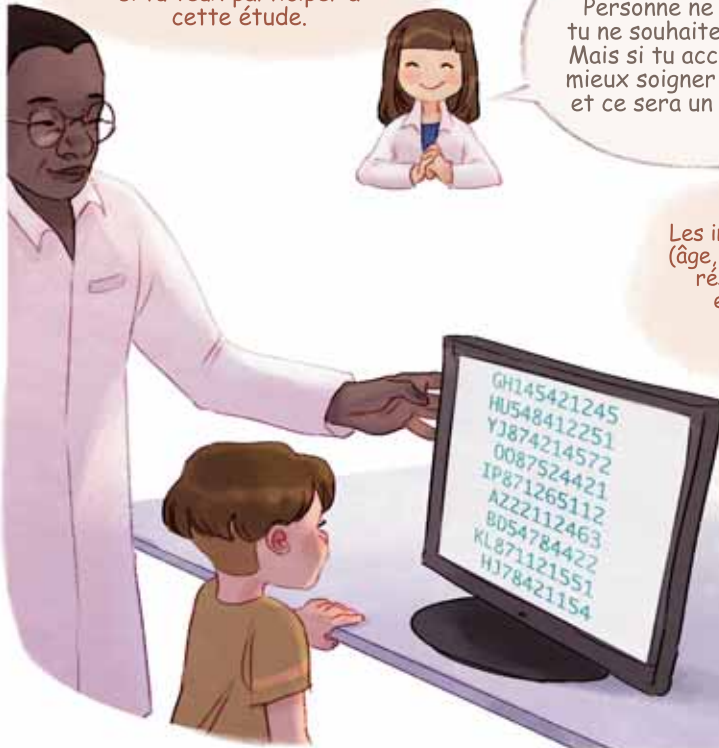

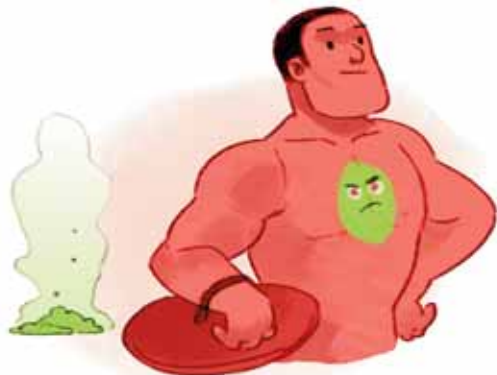

## Institut Pasteur de la Guyane

23 Avenue Pasteur  
BP 6010, 97306 Cayenne Cedex France  
Tél. : +594(0)594 29 26 00  
Fax : +594(0)594 30 94 16

Courriel : [contact@pasteur-cayenne.fr](mailto:contact@pasteur-cayenne.fr)

Site internet : [www.pasteur-cayenne.fr](http://www.pasteur-cayenne.fr)  
Facebook : InstitutPasteurGuyane  
YouTube : Institut Pasteur de la Guyane
